# Supplementary material
Source: Springer Nature journal article supplement (https://www.springermedizin.de/resource/supplementary/13037_2013_172_MOESM3_ESM.pdf/9659468)

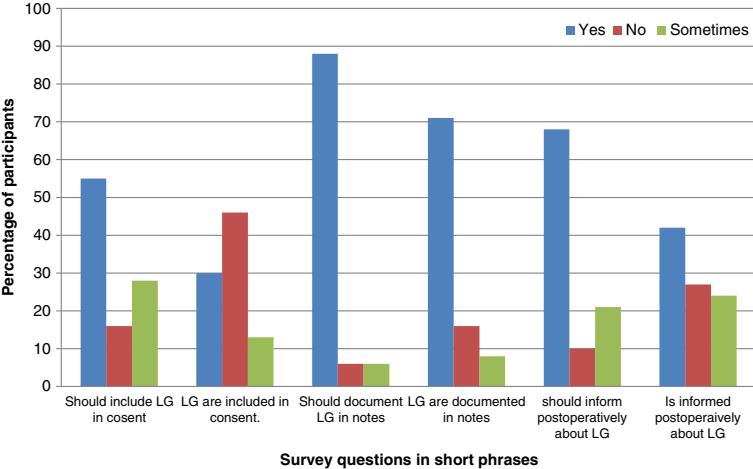

Supplement: MOESM3 [file 9659468]
